# Supplementary material
Source: PubMed Central journal article supplement (PMC4553828)
Supplement: pnas.1423295112.sapp.pdf [file pnas.1423295112.sapp.pdf]

## SI Materials and methods

**Cell culture and transfection.** Primary cultures of neonatal cardiac myocytes were prepared as described previously<sup>1</sup>. Hearts were removed from rat pups at postnatal day 1 (P1). Atria were discarded, and ventricular tissues were digested (51 U/ml collagenase, 0.29 mg/ml pancreatin, 116 mM NaCl, 20 mM HEPES, 1 mM NaH<sub>2</sub>PO<sub>4</sub>, 5.5 mM glucose, 5.4 mM KCl, and 0.8 mM MgSO<sub>4</sub>, pH 7.4). Cells were counted with a hemocytometer and plated onto laminin-coated 6-well plates at a density of  $2 \times 10^6$  cells/well. Cultures were incubated in DMEM/F12 medium (American Type Culture Collection, Manassas, VA, USA) supplemented with 5% horse serum, 1 µg/ml insulin, 10 ng/ml sodium selenite, 1 µg/ml transferrin (Tri-Mix, Invitrogen, Carlsbad, CA, USA), and 0.2% bovine serum albumin (Sigma-Aldrich, St. Louis, MO, USA). Transfections of cardiomyocytes with STIM1-GFP plasmids (3 µg/ml) were performed by electroporation in a Lonza Nucleofector with the kit for rat neonatal cardiac myocytes (Lonza Inc., Basel, Switzerland). Transfections were performed on  $2.5 \times 10^6$  cells in a volume of 100 µl of Nucleofector solution (Lonza) immediately after isolation and prior to plating<sup>1</sup>. After 3 days of transfection, over 95% of the cells were infected when checked using confocal fluorescence imaging. Freshly isolated rat and mouse ventricular myocytes were cultured in M-199 (MEM for mouse) culture medium supplemented with 0.1% ITS and 10 µM blebbistatin (20 µM for mouse myocytes). Experiments were performed 48 h after transfection with an MOI of 50 for human Orai1-mCherry (Vector BioLabs, PA) and 100 MOI for STIM1-mCherry, STIM1-eYFP (Vector BioLabs, PA) or same amount of mCherry alone. STIM1-mCherry and Orai1-mCherry fluorescence was imaged with an excitation of 543 nm and an emission of >580 nm. STIM1-eYFP fluorescence was imaged with an excitation of 514 nm and an emission of >530 nm. When STIM1-eYFP and STIM1-mCherry were co-transfected, multitrack configuration was used for image. The correlation coefficient (i.e. Pearson's Coefficient) was estimated using ImageJ Plugin software JACoP at the identical parameters for control and thapsigargin treated cells.

**Generation of transgenic animal models.** Cardiac myocytes-specific STIM1 knockout mice were generated at Duke University. Briefly, STIM1<sup>flx/flx</sup> mice (C57BL/6) were generated and provided by Anjana Rao's lab. STIM1<sup>flx/flx</sup> mice were crossbred with alpha-MHC-Cre mice (Center for Cardiovascular Development, Baylor college of Medicine) to generate STIM1<sup>flx<sup>+/+</sup></sup> MHC-Cre<sup>+/+</sup> mice. The MHC-Cre STIM1<sup>flx<sup>+/+</sup></sup> were bred with STIM1<sup>flx/flx</sup> mice to produce MHC-Cre<sup>+/+</sup> STIM1<sup>flx/flx</sup> (cardiac specific STIM1KO). Wild-type (WT) animals consisted of STIM1<sup>flx/flx</sup> mice. Phospholamban knockout (PLN<sup>-/-</sup>) mice (in the background of RyR2-R2474S heterozygote in C57BL/6N) were kindly provided by Prof. Stephan E. Lehnart, University Medical Center Goettingen.

**Ca<sup>2+</sup> imaging.** Primary cultures of adult rat ventricular myocytes were loaded with fluo 4 (using 5 µM fluo 4-AM for 20 min at room temperature) and placed in a normal Tyrode's solution containing (in mM): 140 NaCl, 10 HEPES, 0.5 MgCl<sub>2</sub>, 0.33 NaHPO<sub>4</sub>, 5.5 Glucose, 1.8 CaCl<sub>2</sub> and 5 KCl (pH 7.4 with NaOH). Confocal imaging (Zeiss LSM-510 or Zeiss LSM-5 Live, Germany) was used to monitor Ca<sup>2+</sup> signals using either a line scan method (at 1.92 ms per line) or an XY image time series (at 780 ms per image for Ca<sup>2+</sup> waves and 100 ms per image for caffeine-induced Ca<sup>2+</sup> transient measurement). Data were analyzed offline using ImageJ 1.44p (NIH).

**Patch clamp electrophysiology.** Ca<sup>2+</sup> current (I<sub>Ca-L</sub>) from wild type (WT) or cardiac specific STIM1 knock out (KO) ventricular myocytes was recorded using conventional whole-cell patch-clamp configuration (Axopatch 200A, Clampex 8.2). Specifically, cells were held at -80mV. A ramp from -80 mV to -45 mV was run before pre-pulse to inactivate Na<sup>+</sup> channel. I<sub>Ca-L</sub> was elicited by 50 ms pre-pulses from holding potential of -45 mV to test potentials from -40 mV to +60 mV with 10 mV step.

The glass pipette was pulled and fire polished. The resistance of the pipette is 2-3 MΩ when filled with pipette solution containing (in mM): 130 CsCl, 1 MgCl<sub>2</sub>, 10 TEACl, 10 HEPES, 5 Mg-ATP, and 10 EGTA (pH 7.2 with CsOH). The bath solution contained (in mM): 140 NaCl, 10 HEPES, 0.5 MgCl<sub>2</sub>, 0.33 NaHPO<sub>4</sub>, 5.5 Glucose, 1.8 CaCl<sub>2</sub> and 5 CsCl (pH 7.4 with NaOH). Data was analyzed offline using Clampfit 10.2.

**Western blot.** Proteins were extracted from cells or tissues using SDS sample buffer for Western blot experiments. After protein quantification, 50 μg of total proteins were loaded per lane and separated by 4-20 % SDS-polyacrylamide gels (Life Biotech., NY) and transferred onto PVDF membranes. The membrane was blocked in Tris-buffered solution (TBS) containing 0.1% Tween 20 (TBS-T) and 5% nonfat dry milk for 1 hour, followed by an overnight incubation with primary antibody anti-Orai1 (Alomone Labs, Israel) at a dilution of 1:500 in TBS-T containing 5% nonfat milk at 4°C. After three washes (10 min each) with TBS-T, the membrane was then incubated for 1 h with horseradish peroxidase (HRP)-conjugated secondary antibody. After another 3 washes (15 min each) using TBS-T, the membrane was developed using enhanced chemiluminescence (Amersham, Arlington Heights, IL) for Orai1. Negative control was prepared as the same except that the primary antibody was pre-incubated with the epitope peptide (1:1) for 1 hour before incubation with the membrane.

**ELISA.** Costar 96 well plates were coated with neutravidin in NaHCO<sub>3</sub> (100 mmol, pH 8.5) overnight at 4°C. The wells were then blocked by 2% milk in NaHCO<sub>3</sub> at room temperature for 1 h followed by three washes using PBS-T. Then 4 pM purified biotin-STIM1c was added and incubated overnight at 4°C. Wells coated with 2% milk in PBS were set as negative control. Hearts isolated from 8 week old C57BL/6 mice were Langendorff-perfused with saline control or isoproterenol (10<sup>-8</sup> M) for 20 min. The ventricles were then harvested and homogenized in RIPA buffer and incubated with the STIM1c or milk coated wells for 2 h at room temperature followed by 5 washes using PBS-T. Anti- PLN or anti-phospho-PLN (Cell Signaling Technology) was then incubated with the wells at a dilution of 1:1000 at room temperature for 2 h. After 5 washes using PBS-T, HRP conjugated secondary antibody (1:3000) was added and incubated for 1 h at room temperature followed by 5 washes with PBS-T. 100 microliters per well of ABTS with 0.05% H<sub>2</sub>O<sub>2</sub> was then added and incubated for 30 min at room temperature. The plate was read at 405 nm with a plate reader. The data presented were background subtracted (milk) and normalized by input PLN level. Signal of PLN binding to STIM1c in control heart lysate was set as 100%. See Fig. S9.

**Immunochemistry and STIM1 immunofluorescence analysis.** Freshly isolated rat or mouse ventricular myocytes were fixed using 3.7% paraformaldehyde in phosphate-buffered saline solution (PBS) for 15 min. After three washes with PBS, cells were permeabilized and blocked in PBS containing 5% goat serum and 0.3% triton X-100 for 1 h at room temperature. Cells were then incubated overnight at 4°C with polyclonal anti-STIM1 at a dilution of 1:100 in PBS containing 5% goat serum. After 3 washes, cells were incubated for 1 h at room temperature with Alexa Fluor 633-conjugated goat anti-rabbit. Following 6 washes with PBS, fluorescence images were acquired using a Zeiss LSM-510 laser scanning confocal microscopy at excitation of 633 nm and emission of >650 nm. STIM1 immunofluorescence was quantified using ImageJ 1.44 p (NIH). Specifically, the STIM1 immunofluorescence images were adjusted with threshold (the pixel value used to find the edge of STIM1 immunofluorescence closed regions) at an intensity of 2 x mean intensity + 3 x SD. The threshold area was outlined under particle analysis (size 0-infinity; circularity 0-1). The fraction of the outlined STIM1 immunofluorescence was measured and calculated as the following:

$$\text{Fraction (\%)} = 100 \times \frac{\text{pixel of outlined area}}{\text{pixel of whole cell}}$$

**Fluorescence recovery after photobleaching (FRAP).** A 3 x 3  $\mu\text{m}$  area (avoiding nucleus) was used for the photobleaching experiments using high illumination intensity (100% 488 nm laser) in STIM1-GFP transfected rat postnatal cardiac myocytes. The fluorescence recovery in the bleached area was monitored at 2 s per image. Data were analyzed offline using ImageJ (1.44p).

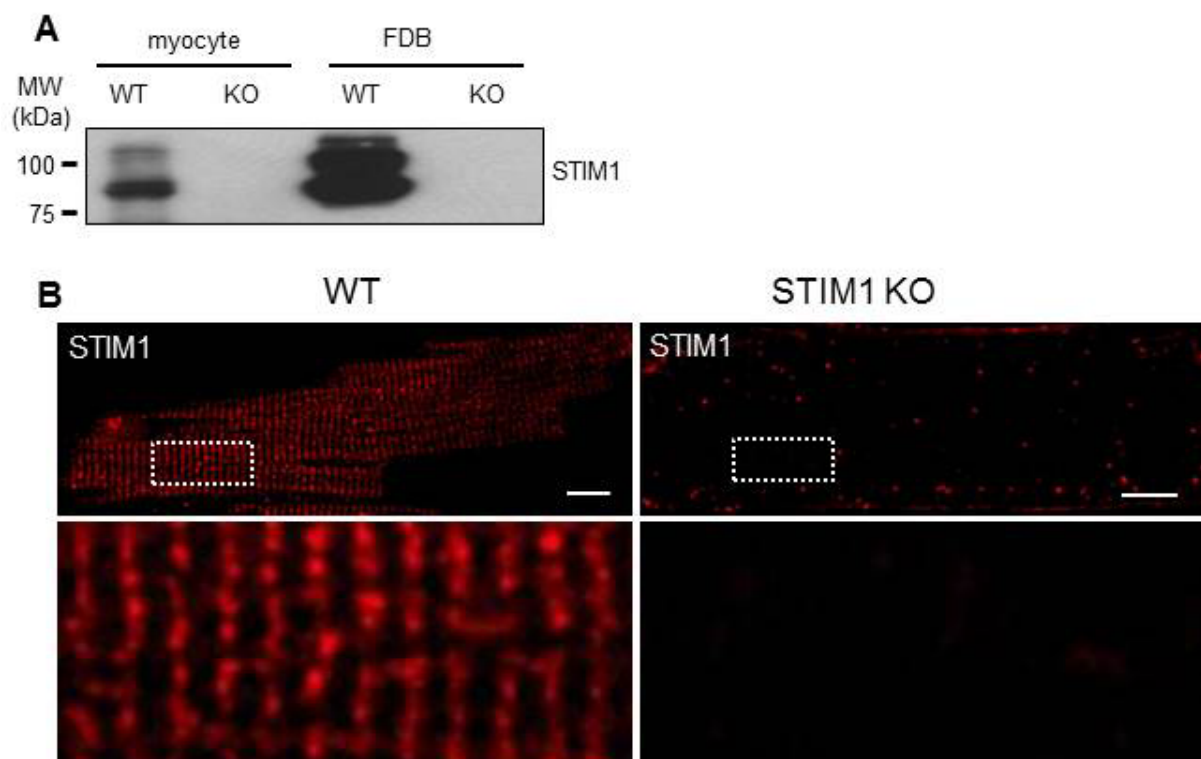

**Figure S1. The specificity of the anti-STIM1.** **A.** Western blot shows anti-STIM1 antibody specifically recognizes STIM1, with STIM1 null mouse cardiac myocytes and flexor digitorum brevis (FDB) skeletal muscle as negative control. **B.** Immunofluorescence shows anti-STIM1 antibody specifically recognizes STIM1 in mouse ventricular myocyte. Lower panel, amplification of the corresponding boxed areas. Scale bar, 10  $\mu$ m.

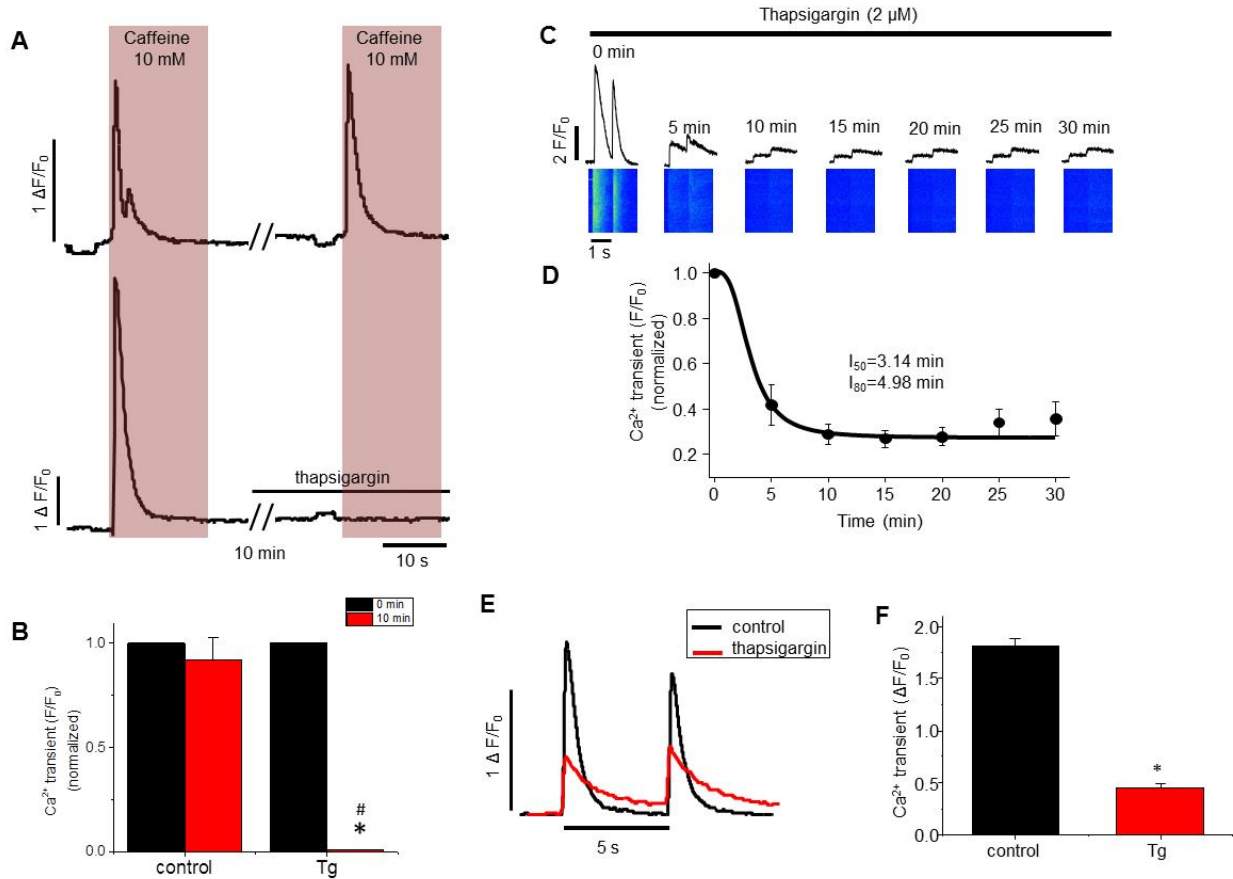

**Figure S2. Effect of thapsigargin (10  $\mu\text{M}$ ) on SR  $\text{Ca}^{2+}$  depletion.** **A.** An XY time series image (100 ms per image) profile show  $\text{Ca}^{2+}$  transients induced by caffeine (10 mM) at 0 and 10 min of perfusion with normal Tyrode's solution in the absence (upper panel) and presence of thapsigargin (10  $\mu\text{M}$ ) in adult rat ventricular myocytes. **B.** Summary data show the peak of the caffeine-stimulated  $[\text{Ca}^{2+}]_i$  level in control and thapsigargin treated rat ventricular myocytes ( $n=10$  and  $n=12$  cells in control and thapsigargin groups, respectively). **C.** Line scan images of fluo-4 fluorescence show the time-course of the fall in SR  $\text{Ca}^{2+}$  release in rat ventricular myocytes due to SERCA2a inhibition by thapsigargin (2  $\mu\text{M}$ ). The residual  $[\text{Ca}^{2+}]_i$  transients produced by field stimulations (FS) are due to  $\text{Ca}^{2+}$  entry through the L-type  $\text{Ca}^{2+}$  channels. Field stimulations (FS) imposed at 1 Hz. **D.** Summary data show the effect of thapsigargin on SERCA2a ( $n=5$  cells). **E.**  $[\text{Ca}^{2+}]_i$  transients induced by field stimulation (FS, 0.2 Hz) before and after 10 min application of thapsigargin (10  $\mu\text{M}$ ). **F.** Summary data show the decrease of  $[\text{Ca}^{2+}]_i$  transient (FS induced) amplitudes in the presence of thapsigargin ( $n=5$  cells). \*  $p < 0.05$  vs control; #  $p < 0.05$  vs 0 min.

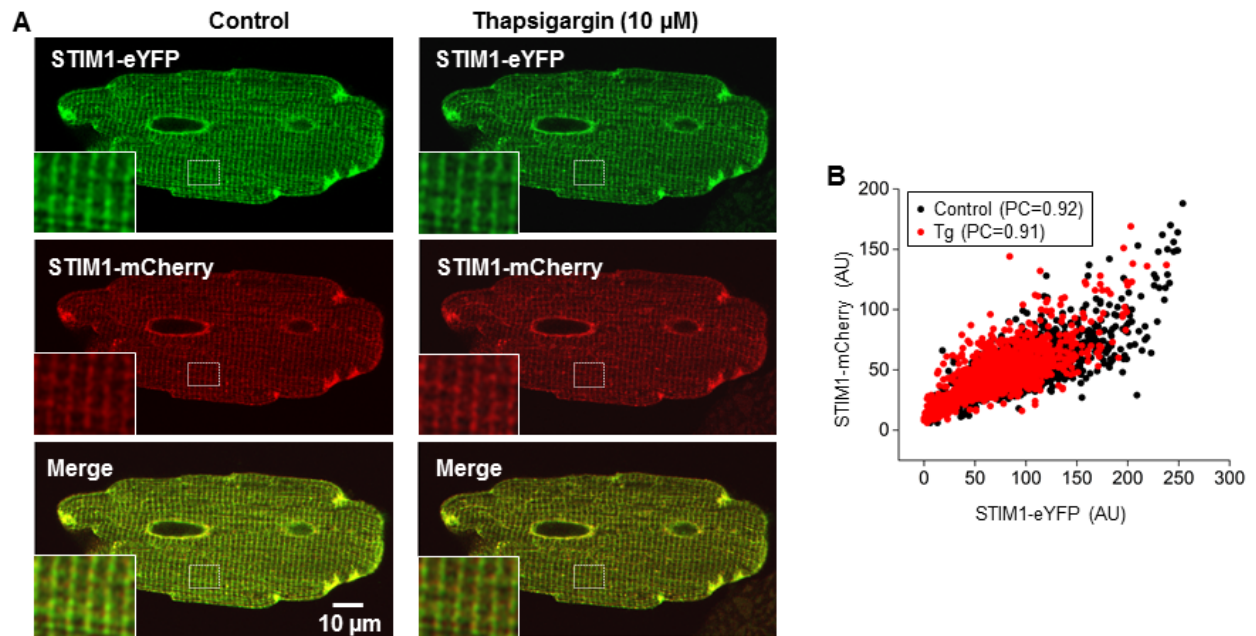

**Figure S3. The co-localization of STIM1-mCherry and STIM1-eYFP.** **A.** The fluorescence of STIM1-mCherry and STIM1-eYFP in short-term cultured rat ventricular myocytes in the absence and presence of thapsigargin (10  $\mu$ M). Inset, zoom in of the boxed area. **B.** Correlation of STIM1-mCherry and STIM1-eYFP in the absence and presence of thapsigargin. The Pearson's Coefficients (PC) are 0.92 and 0.91 before and after treatment with thapsigargin for 30 min.



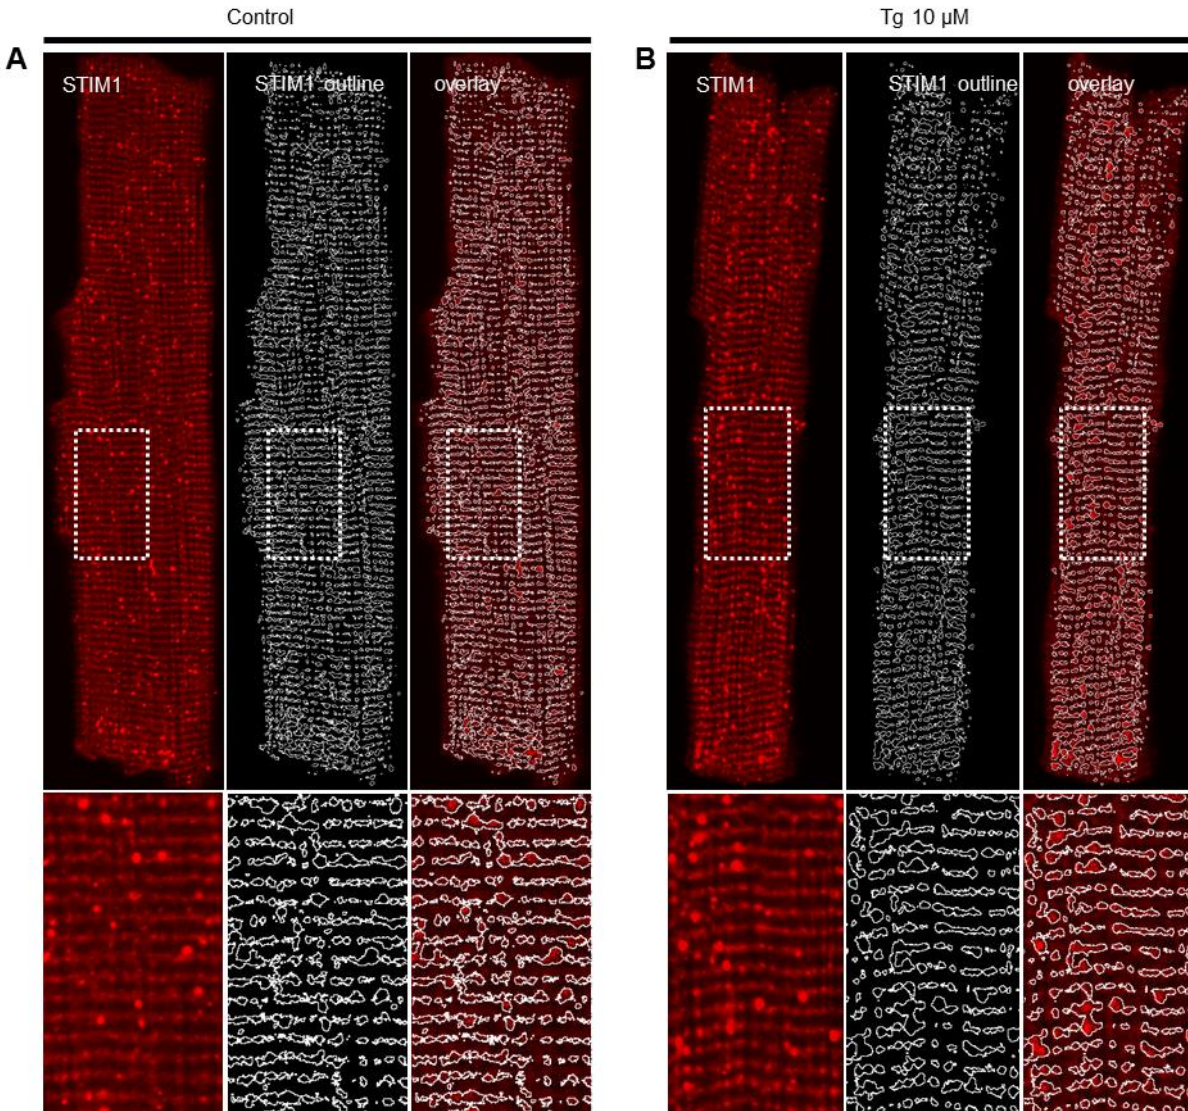

**Figure S4. Subcellular distribution of STIM1 protein in control and SR Ca<sup>2+</sup> depleted ventricular myocytes.** **A.** Confocal immunofluorescence image (red) of the distribution of STIM1 in a control rat ventricular myocyte (left panel). The dashed white rectangular region is enlarged in the panel (bottom left). Threshold-outline of the fluorescence intensity (see Methods) from the same cell is shown in the middle panel. The outline image is merged with the immunofluorescence image (right panel). **B.** Same as A. 20 minutes after treatment with 10 μM thapsigargin. Puncta and linear structures appear at z-disk in both A and B. The fractions of STIM1 immunofluorescence at or above the threshold are  $20 \pm 0.6$ ,  $21 \pm 0.7$  and  $21 \pm 0.4$  % in control (n=9 cells), Tg (2 μM, n=5 cells) and Tg (10 μM, n=9 cells), respectively. No significant difference was detected between control and SR depleted rat ventricular myocytes at either 2 or 10 μM thapsigargin.

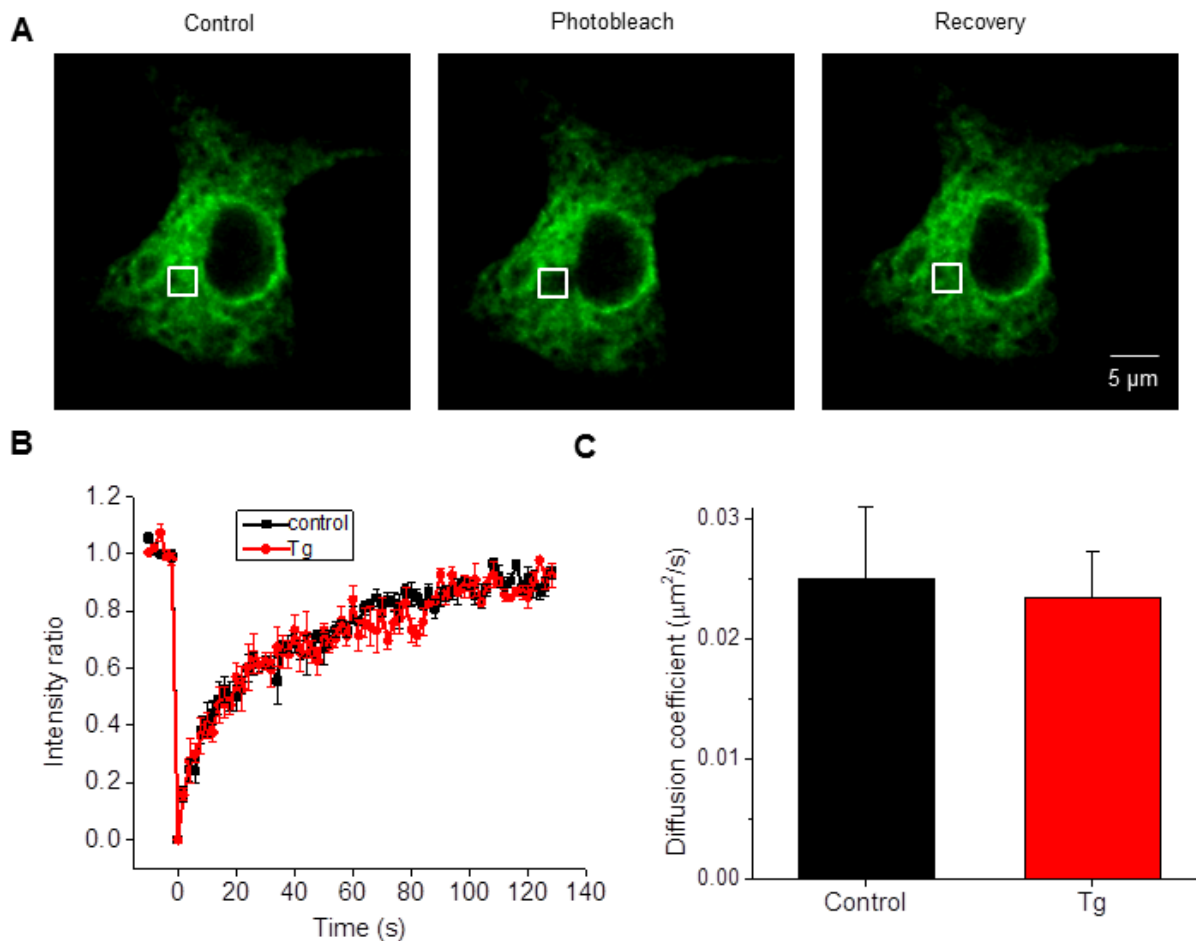

**Figure S5. STIM1 mobility in neonatal rat cardiac myocytes.** **A.** The fluorescence image shows the successful transfection of STIM1-GFP in neonatal rat cardiac myocytes in short-term primary culture. White boxes show before photo bleaching, right after photo bleaching, and after fluorescence recovery in a control cell. **B.** STIM1-GFP fluorescence intensity ratio change in fluorescence recovery after photobleaching (FRAP) in the absence and presence of thapsigargin (2  $\mu\text{M}$ ). **C.** Summary data show the diffusion coefficient of STIM1-GFP in the absence and presence of thapsigargin.  $n=5$  cells for control and thapsigargin, respectively.



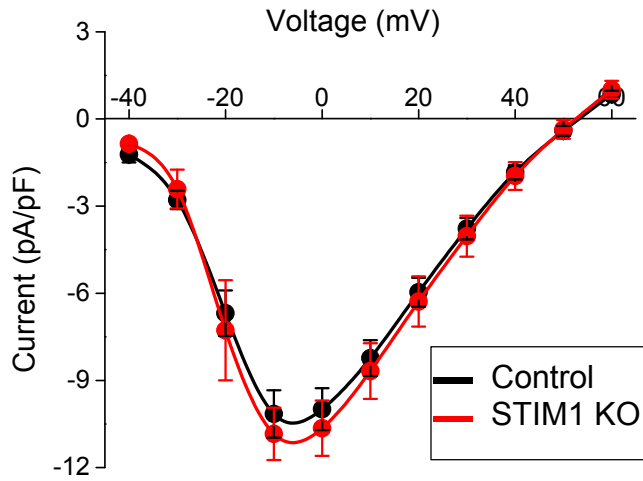

**Figure S6. The L-type  $\text{Ca}^{2+}$  current in WT and cardiac specific STIM1 knockout ventricular myocytes.** n=14 and 5 cells in WT and STIM1 KO group, respectively.

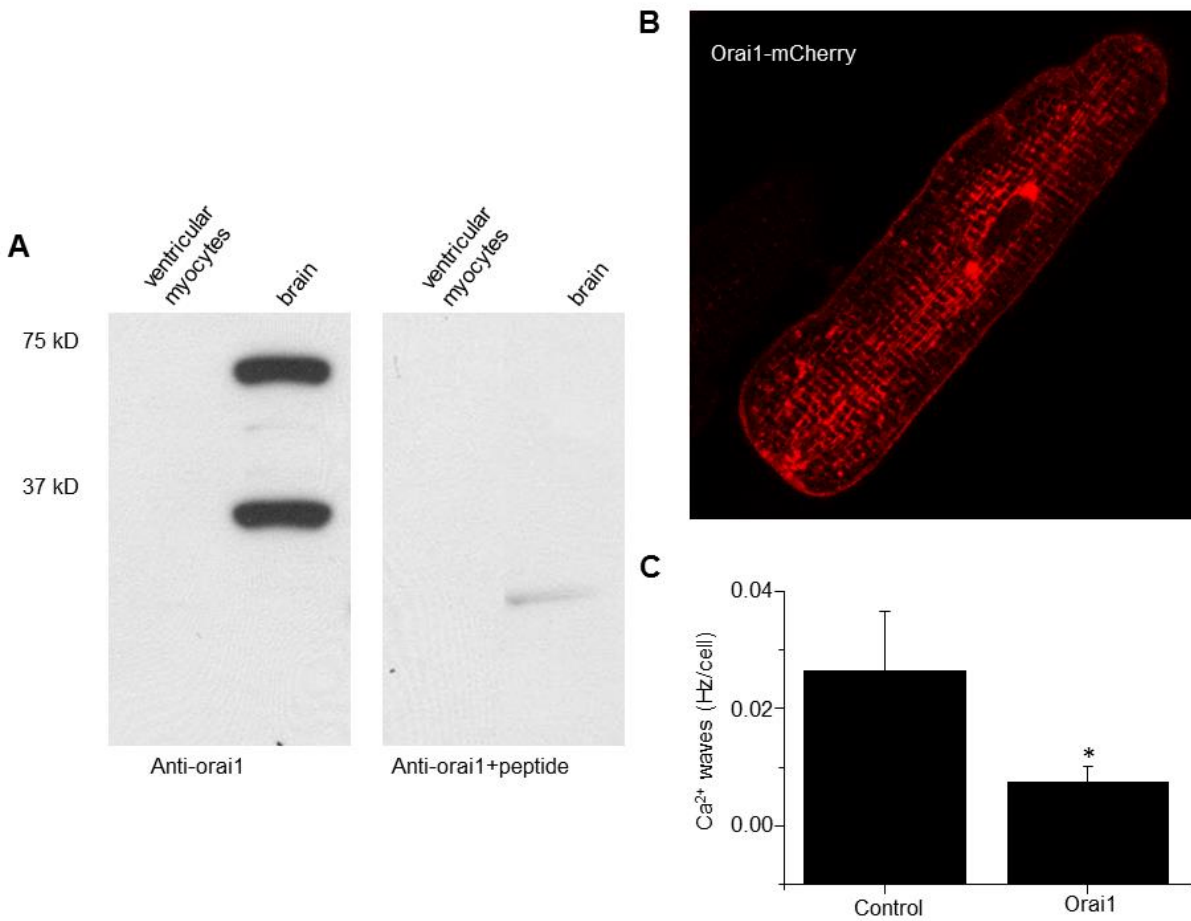

**Figure S7. The effect of Orai1 overexpression on spontaneous  $\text{Ca}^{2+}$  wave frequency in ventricular myocytes.** **A.** Western blot shows Orai1 is expressed in rat brain tissue but not in rat ventricular myocytes (Left panel). Western blot shows that incubation of anti-Orai1 with antigen peptide fails to detect Orai1 in rat brain tissue and ventricular myocytes, suggesting that

the bands seen in left panel are Orai1 protein (right panel). **B.** Fluorescence image from a rat ventricular myocyte expressing Orai1-mCherry. **C.** Summary data showing the spontaneous  $\text{Ca}^{2+}$  wave frequency in control (mCherry) and Orai1-mCherry groups (n=40 and 20 cells, respectively). Orai1-mCherry transfected cells show decreased frequency (0.007 Hz) of spontaneous  $\text{Ca}^{2+}$  waves comparing to that in control cells (0.026 Hz), \*p<0.05 vs control.

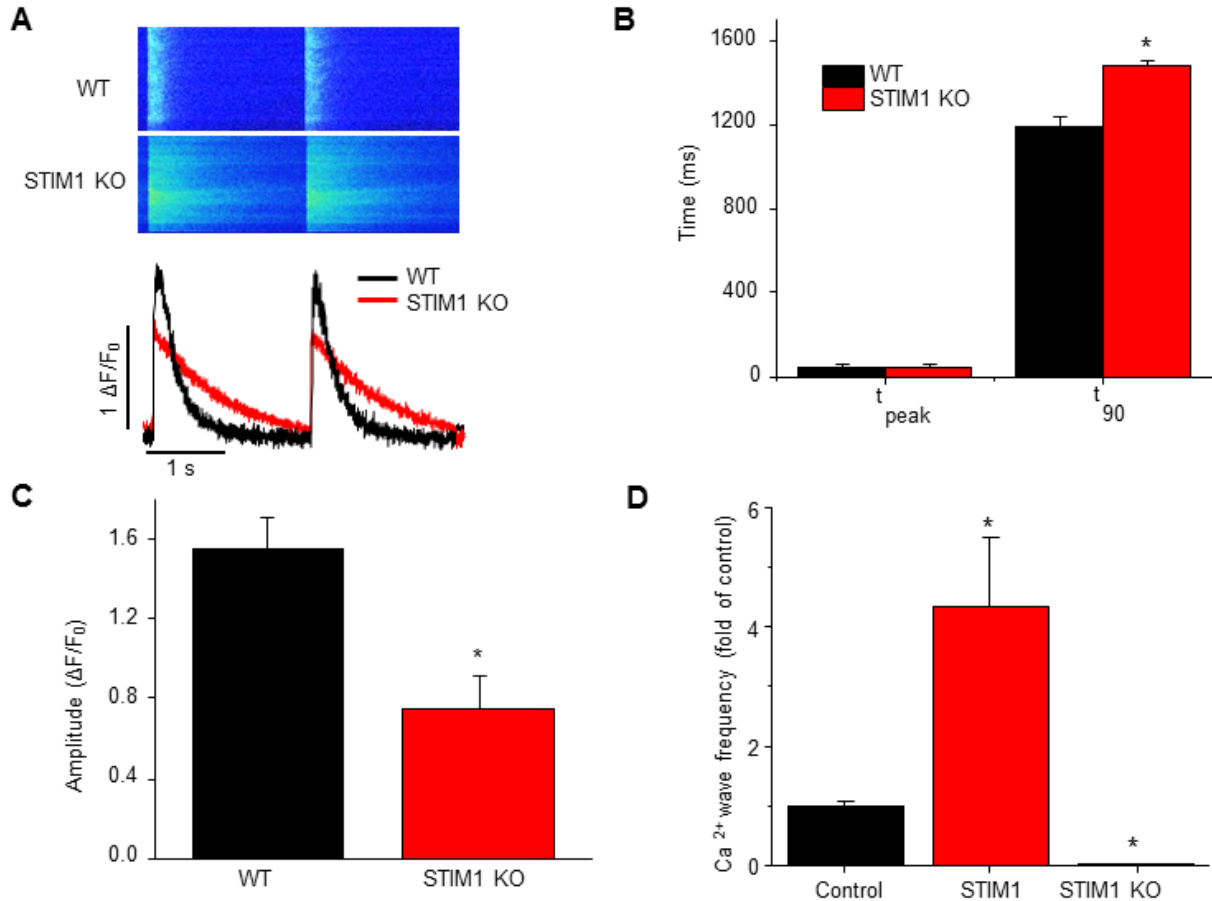

**Figure S8.  $\text{Ca}^{2+}$  handling changes in STIM1 knockout (KO) mouse ventricular myocytes.** **A.** Line scan images of fluo 4 fluorescence and the profiles show  $[\text{Ca}^{2+}]_i$  transient induced by field stimulation (FS, 0.5 Hz) in wild type (WT) and STIM1 KO mouse ventricular myocytes. **B.** Summary data show the time to peak and 90% decay of  $[\text{Ca}^{2+}]_i$  transient in WT and STIM1 KO myocytes. **C.** Summary data show the change of  $[\text{Ca}^{2+}]_i$  transient amplitude in WT and STIM1 KO myocytes. \* p<0.05 vs WT. n= 18 and 6 cells in WT and STIM1 KO groups, respectively. **D.** Summary data of  $\text{Ca}^{2+}$  wave frequency change in STIM1 KO and STIM1 overexpressing mouse ventricular myocytes. Data were normalized to control (STIM1 KO to WT control, STIM1-mCherry overexpressed to mCherry control); n=27, 16, 46, and 48 cells in WT, STIM1 KO, mCherry, and STIM1-mCherry overexpressing myocytes, respectively.

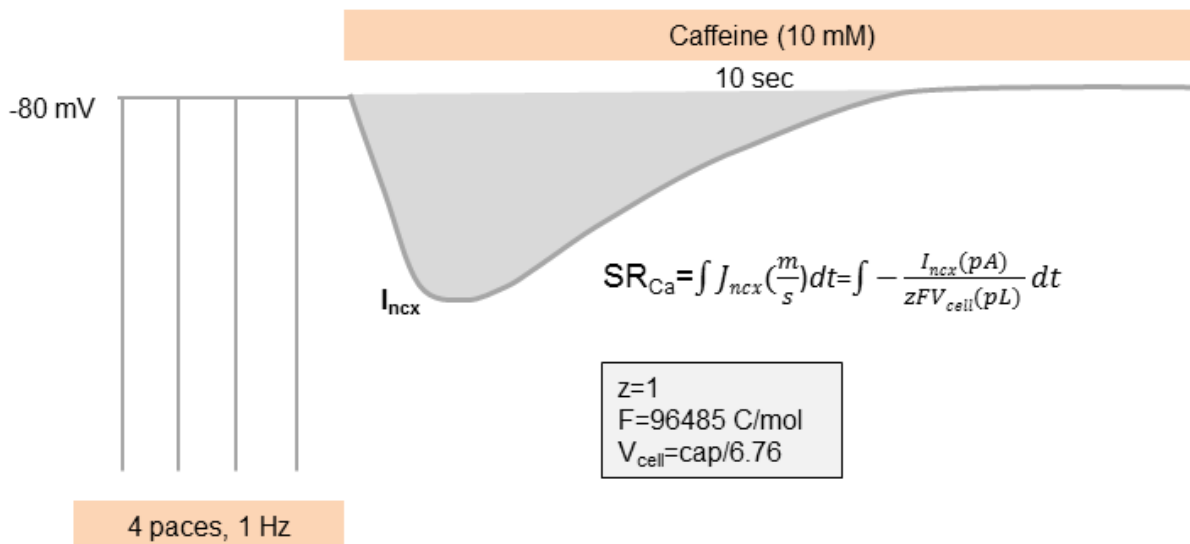

**Figure S9. Illustration of the protocol and formula used to measure SR Ca<sup>2+</sup> content.** Four repetitive depolarizations from -80 mV to 0 mV were imposed before caffeine (10 mM) was applied. The 1.5 times integral of Na/Ca<sup>2+</sup> exchanger current (NCX current, I<sub>ncx</sub>) upon caffeine stimulation was regarded as SR Ca<sup>2+</sup> content<sup>2</sup>. The following formula was used to integrate the I<sub>ncx</sub>.

$$\int J_{ncx} \left( \frac{m}{s} \right) dt = \int - \frac{I_{ncx} (pA)}{zFV_{cell} (pL)} dt$$

Where, z is the number of net charge movement (which is 1 for I<sub>ncx</sub>); F, the Faraday constant; V<sub>cell</sub>, the volume of the cell. The ventricular myocyte volume was calculated based on cell capacitance as previously described<sup>2</sup>: volume (pL)=capacitance (pF)/6.76.

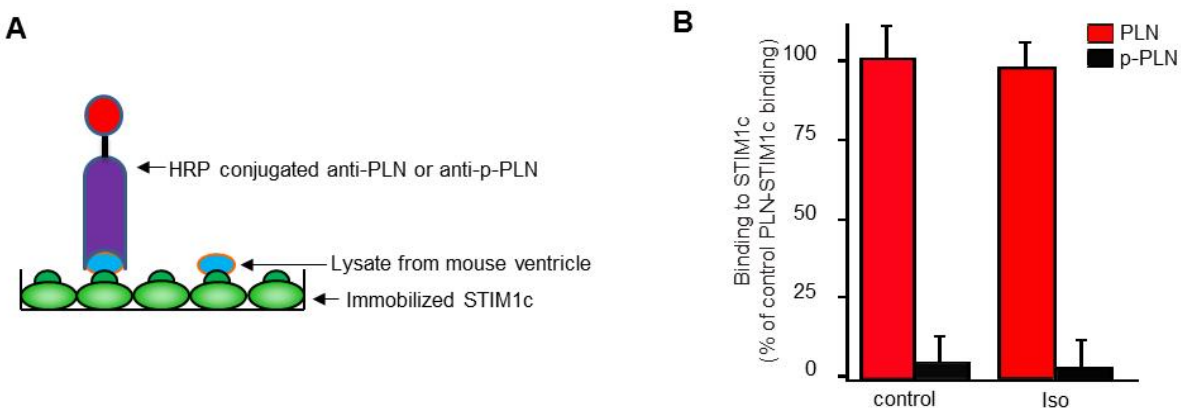

**Figure S10. ELISA shows that non-phosphorylated phospholamban binds to STIM1 c-terminus in heart.** **A.** Diagram of ELISA to characterize the interaction of STIM1c and endogenous PLN and p-PLN. Purified STIM1c protein was coated to a 96 well plate and incubated with lysates from mouse heart. Anti-PLN and anti-p-PLN antibodies were used to detect the amounts of PLN and p-PLN that bind to STIM1c. **B.** Interaction of PLN and p-PLN with STIM1c in mouse heart. Two control hearts and two isoproterenol-treated hearts were used. Each binding condition was performed in triplicate.

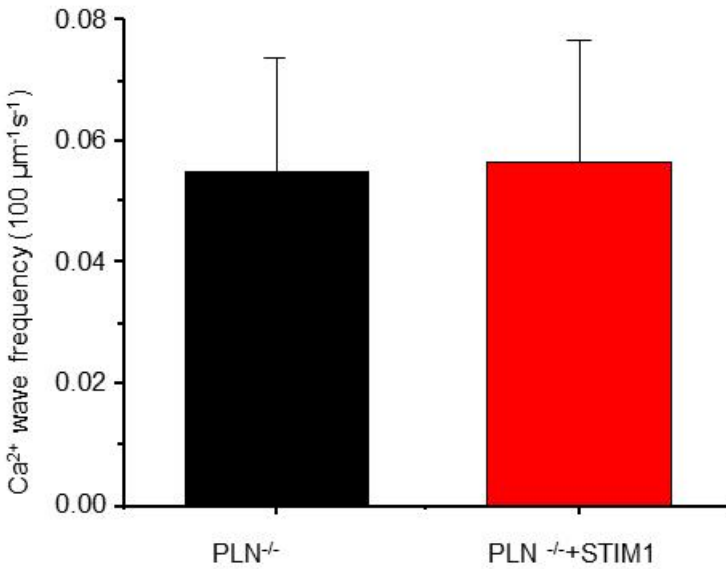

**Figure S11. STIM1 action in phospholamban knockout (PLN<sup>-/-</sup>) cardiac ventricular myocytes.**

The frequency of Ca<sup>2+</sup> waves was measured in PLN<sup>-/-</sup> mouse ventricular myocytes (in the background of C57BL/6N crossed with RyR2-R2474S heterozygote). When STIM1 was over-expressed in these cells there was no change in the frequency of Ca<sup>2+</sup> waves. (This mouse model was kindly provided by Prof. Stephan E. Lehnart, University Medical Center Goettingen). N=24 and 19 cells in PLN<sup>-/-</sup> control myocytes and STIM1 overexpressing myocytes, respectively.

**References**

1. Lund LM, Kerr JP, Lupinetti J, Zhang Y, Russell MA, Bloch RJ, Bond M. Synemin isoforms differentially organize cell junctions and desmin filaments in neonatal cardiomyocytes. *FASEB journal : official publication of the Federation of American Societies for Experimental Biology*. 2012;26:137-148
2. Walden AP, Dibb KM, Trafford AW. Differences in intracellular calcium homeostasis between atrial and ventricular myocytes. *J.Mol.Cell Cardiol*. 2009;46:463-473
